# Supplementary material
Source: PubMed Central journal article supplement (PMC3993359)
Supplement: JB.00006-14_zjb999093117so1.pdf [file JB.00006-14_zjb999093117so1.pdf]

# Figure S1

**A**

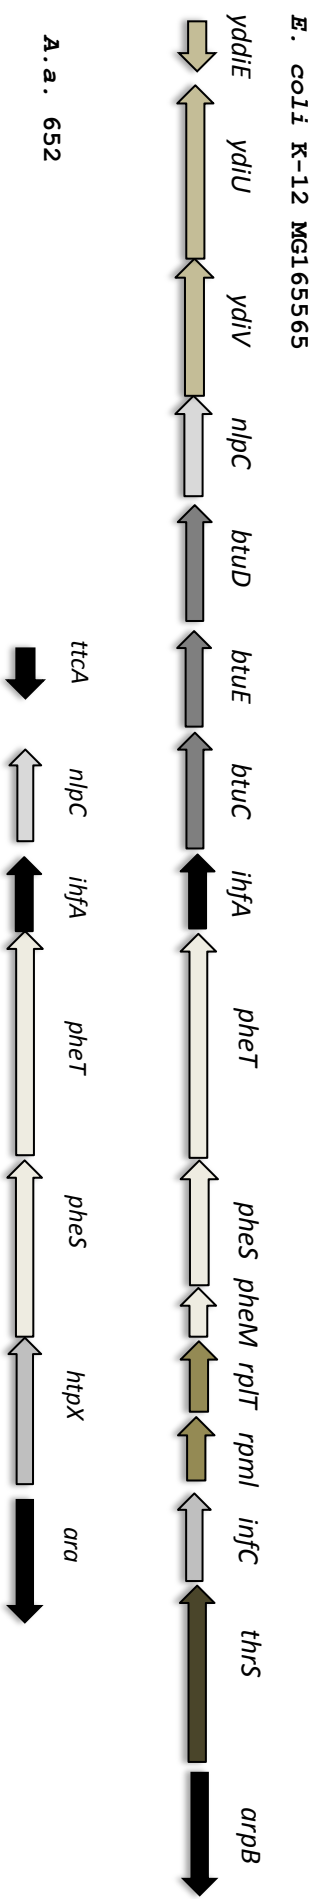

*E. coli* K-12 MG165565

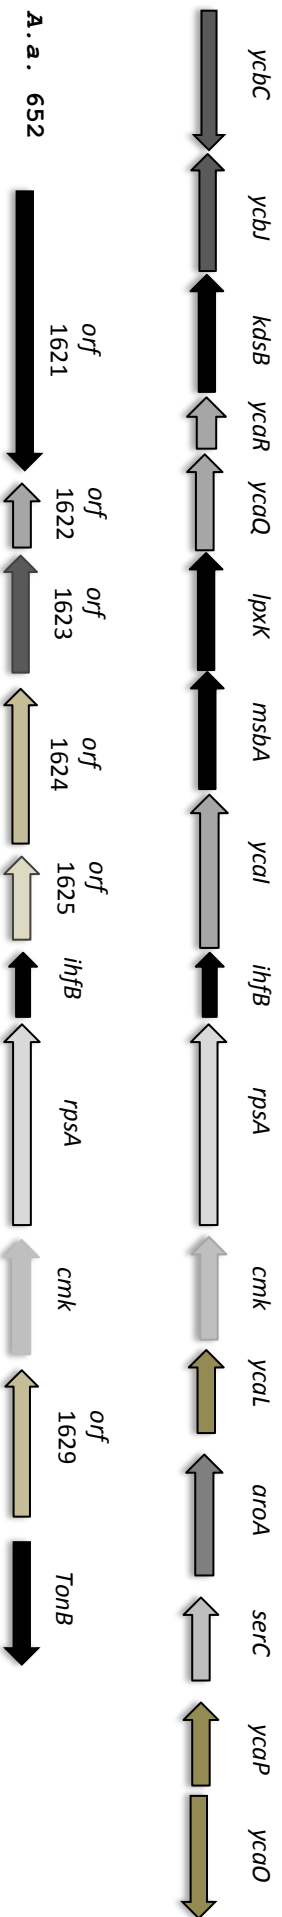

**B**

|                           |    |                                                                |    |
|---------------------------|----|----------------------------------------------------------------|----|
| <i>A. a.</i> IHF $\alpha$ | 3  | LTKVELLAENLIEK-FHLSKREAKDIVESFEEIRVALETGNDVKLSGFNGFELRDKASRP   | 61 |
|                           |    | +TK EL E L++K ++ + ++ V+++ E+++ IE G +++ GFG+E L + R           |    |
| <i>A. a.</i> IHF $\beta$  | 1  | MTKSELLIELLVQKNSNIIPKHYEEAVKAILLEQMSYVLEHGERIEVRGFGSFSLHCRQPRI | 60 |
| <i>A. a.</i> IHF $\alpha$ | 62 | GRNPKTGESVPSARRVVVEFKPGQKLRNRVE                                | 92 |
|                           |    | GRNPKTGE V + A+ V EK G++LR RV+                                 |    |
| <i>A. a.</i> IHF $\beta$  | 61 | GRNPKTGEQVKLIDAKCVPEYFKAGKELRERVD                              | 91 |

**Figure S1. (A)** Genomic organization of the *ihfA* and *ihfB* loci in *A. actinomycetemcomitans* compared to the related loci in *Escherichia coli*. **(B)** Protein sequence alignment of *A. actinomycetemcomitans* IHF $\alpha$  and IHF $\beta$ . Residue numbers are shown to the right of each protein sequence.

**Table S1. Strains and plasmids used in this work**

| Strain or plasmid                            | Derived, relevant genotype <sup>a</sup><br>or characteristics <sup>b</sup>                                                                                           | Source or reference |
|----------------------------------------------|----------------------------------------------------------------------------------------------------------------------------------------------------------------------|---------------------|
| <i>Escherichia coli</i>                      |                                                                                                                                                                      |                     |
| XL1-Blue MRF'                                | $\Delta(mcrA)183 \Delta(mcrCB-hsdSMR-mrr)173$<br><i>endA1 supE44 thi-1 recA1 gyrA96 relA1 lac</i><br>[F' <i>proAB. lacI<sup>q</sup>ZΔM15 Tn10 (Tc<sup>r</sup>)</i> ] | Stratagene          |
| LMG194                                       | F <sup>-</sup> $\Delta(lacIPOZY)X74$ <i>galE galK thi rpsL ΔphoA</i><br>(PvuII) <i>ara714 leu::Tn10</i>                                                              | Invitrogen          |
| BL21                                         | F <sup>-</sup> <i>ompT hsdS<sub>B</sub>(r<sub>B</sub><sup>-</sup> m<sub>B</sub><sup>-</sup>)gal dcm rne131 (DE3)</i>                                                 | Novagen             |
| Top10                                        | F <sup>-</sup> <i>mcrA Δ(mrr-hsdRMS-mcrBC)</i><br>Φ80 <i>lacZΔM15 ΔlacX74 recA1 araD139</i><br>$\Delta(ara leu) 7697 galU galK rpsL (Str^r)$<br><i>endA1 nupG</i>    | Invitrogen          |
| <i>Aggregatibacter actinomycetemcomitans</i> |                                                                                                                                                                      |                     |
| 652                                          | Wild type, serotype c                                                                                                                                                | (30)                |
| 652-TE78                                     | 652, $\Delta ihfA$                                                                                                                                                   | This study          |
| 652-TE79                                     | 652, $\Delta ihfB$                                                                                                                                                   | This study          |
| 652-TE-23                                    | 652, <i>IsrR::IsrR23-lacZ</i>                                                                                                                                        | This study          |
| 652-TE78-23                                  | 652, $\Delta ihfA IsrR::IsrR23-lacZ Sp^r$                                                                                                                            | This study          |
| 652-TE79-23                                  | 652, $\Delta ihfB IsrR::IsrR23-lacZ Sp^r$                                                                                                                            | This study          |
| 652-TE-75                                    | 652, <i>IsrA::IsrA75-lacZ</i>                                                                                                                                        | This study          |

|                      |                                                                 |                                  |
|----------------------|-----------------------------------------------------------------|----------------------------------|
| 652-TE78-75          | 652, $\Delta ihfA$ <i>lsrA::lsrA75-lacZ</i> Sp <sup>r</sup>     | This study                       |
| 652-TE79-75          | 652, $\Delta ihfB$ <i>lsrA::lsrA75-lacZ</i> Sp <sup>r</sup>     | This study                       |
| Plasmid              |                                                                 |                                  |
| pYA3883              | Amp <sup>r</sup> , expression vector                            | (48)                             |
| pET28a+              | Km <sup>r</sup> , pBR322 expression vector                      | Novagen                          |
| pJT3                 | Km <sup>r</sup> , <i>lacZ</i> promoterless                      | (47)                             |
| pJT7                 | pYGK, Km <sup>r</sup> , cloning vector                          | Torres-Escobar et al., submitted |
| pJT1                 | Sp <sup>r</sup> , suicide vector                                | (47)                             |
| pJT10                | Sp <sup>r</sup> , suicide vector                                | Torres-Escobar et al., submitted |
| Derived from pYA3883 |                                                                 |                                  |
| pATE76               | Amp <sup>r</sup> , P <sub>BAD</sub> <i>ihfA</i> -(AUI)-(6X His) | This study                       |
| pATE77               | Amp <sup>r</sup> , P <sub>BAD</sub> <i>ihfB</i> -(AUI)-(6X His) | This study                       |
| Derived from pET28a+ |                                                                 |                                  |
| pATE80               | Km <sup>r</sup> , pET28a+ <i>ihfB</i> -(AUI)-(6X His)           | This study                       |
| Derived from pJT1    |                                                                 |                                  |
| pATE78               | Sp <sup>r</sup> , flanking region to <i>ihfA</i>                | This Study                       |
| pATE79               | Sp <sup>r</sup> , flanking region to <i>ihfB</i>                | This Study                       |
| Derived from pJT3    |                                                                 |                                  |
| pATE23               | Km <sup>r</sup> , P <sub>lSrR -1 to 255</sub> - <i>lacZ</i>     | (30)                             |
| pATE68               | Km <sup>r</sup> , P <sub>lSrR -82 to -255</sub> - <i>lacZ</i>   | (30)                             |
| pATE69               | Km <sup>r</sup> , P <sub>lSrR -1 to 193</sub> - <i>lacZ</i>     | This study                       |
| pATE70               | Km <sup>r</sup> , P <sub>lSrR -1 to 143</sub> - <i>lacZ</i>     | This study                       |
| pATE100              | Km <sup>r</sup> , P <sub>lSrR -1 to 414</sub> - <i>lacZ</i>     | This study                       |
| pATE71               | Km <sup>r</sup> , P <sub>lSrA -1 to 249</sub> - <i>lacZ</i>     | (30)                             |
| pATE73               | Km <sup>r</sup> , P <sub>lSrA -88 to 414</sub> - <i>lacZ</i>    | This study                       |
| pATE74               | Km <sup>r</sup> , P <sub>lSrA -43 to 414</sub> - <i>lacZ</i>    | This study                       |

|                    |                                                                       |            |
|--------------------|-----------------------------------------------------------------------|------------|
| pATE75             | Km <sup>r</sup> , P <sub>l<sub>SrA</sub>-1 to 414</sub> - <i>lacZ</i> | This study |
| Derived from pJT7  |                                                                       |            |
| pATE92             | Km <sup>r</sup> , P <sub>ihf</sub> - <i>infA</i>                      | This study |
| pATE93             | Km <sup>r</sup> , P <sub>ihf</sub> - <i>infB</i>                      | This study |
| Derived from pJT10 |                                                                       |            |
| pATE94             | Sp <sup>r</sup> , <i>l<sub>SrR</sub>::l<sub>SrR</sub>23-lacZ</i>      | This study |
| pATE95             | Sp <sup>r</sup> , <i>l<sub>SrA</sub>::l<sub>SrA</sub>75-lacZ</i>      | This study |

---

<sup>a</sup> In the descriptions of the genotype, P represents promoter, and the subscript refers to the promoter fragment driving *lacZ* transcription. For consistency, nucleotide -1 is the first base upstream from the *l<sub>SrR</sub>* or *l<sub>SrA</sub>* start codon. <sup>b</sup> Amp<sup>r</sup> ampicillin resistance, Km<sup>r</sup> kanamycin resistance, Sp<sup>r</sup> spectinomycin resistance, Tc<sup>r</sup> tetracycline resistance.

**TABLE S2. Oligonucleotides used in this work**

---

–

| Related product, name              | Sequence 5' - 3'                                               |
|------------------------------------|----------------------------------------------------------------|
| <hr/>                              |                                                                |
| –                                  |                                                                |
| <b>Upstream region <i>IsrR</i></b> |                                                                |
| ATE-6R <i>Bam</i> HI               | CTTGATTATCCG <u>TGGATCCC</u> ATTAATTCGTTC                      |
| ATE-172F <i>Kpn</i> I              | TCAAATACTAG <u>GGTACCT</u> CAGGAATGCACAAAATT TC                |
| ATE-173F <i>Kpn</i> I              | TCTGGATAATAT <u>GGTACCT</u> ATCTAAAAATCGCCT                    |
| ATE-242F <i>kpn</i> I              | GCCGGCGATAATTTTCAT <u>GGTACC</u> AGCGTGGATTTCCCCGCCCG          |
| <br>                               |                                                                |
| <b>Upstream region <i>IsrA</i></b> |                                                                |
| ATE-7F <i>Kpn</i> I                | CTTGATTATCCG <u>TGGTACCC</u> ATTAATTCGTTC                      |
| ATE-165R <i>Bam</i> HI             | GCTTTCAGCACTT <u>CGGATCCC</u> ATGCCGAAAACG                     |
| ATE-166F <i>Bam</i> HI             | CGCCGAGCAGTGCGTGGGAT <u>CCCATT</u> TACCGGC                     |
| <br>                               |                                                                |
| <b><i>ihfA</i>-AUI-6His</b>        |                                                                |
| ATE-188F <i>Nco</i> I              | GCTTATTTGAGAGATTA <u>ACCATGGC</u> ATTAATACTAAAGTAG             |
| ATE-189R <i>Apal</i>               | CAGTAGCCAATTTATTAG <u>GGGCC</u> CAGCTTTCGGTTTGACC              |
| <br>                               |                                                                |
| <b><i>ihfB</i>-AUI-6His</b>        |                                                                |
| ATE-190F <i>Nco</i> I              | GAGTTAGGAGAAT <u>CCATGGC</u> AAAGTCAGAACTTATTG                 |
| ATE-191R <i>Apal</i>               | CCGTTATGAAAAGTTAGTTAGTAAAAAATTAG <u>GGCCCT</u> GCTGCATAAACGTC  |
| ATE192F <i>Nco</i> I               | CAGGAGGAATTA <u>ACCATGGC</u> AAAGTCAGAACTTATTGAAC              |
| ATE193R <i>Xho</i> I               | CTCGTTATTTAATGATGATGATGATGATG <u>CTCGAGG</u> ATGTAGCGGTACGTGTC |

**Deletion of *ihfA***

ATE-157F *NheI* GGACGAAAAGGCCGCTAGCGGCGTGCACCAAG  
ATE-134R *XhoI* CGAGTTCTACTTTAGTTAATGTCATCTCGAGAGTTTAATCTCTC  
ATE-135F *XhoI* CAAACCGAAAGCTTAACTCGAGTAAATTGGCTACTGC  
ATE-158R *SacI* CTAGAAATTGTATGTGAGAGCTCTTAAATTCGTCTTGCC

**Deletion of *ihfB***

ATE-159F *NheI* CAAACCTAACGCTAGCACACAATTCGCCGAAACCC  
ATE-142R *XhoI* CAATAAGTTCTGACTTTGTCATCTCGAGATATTCTCCTAACTC  
ATE-143F *XhoI* GACGTTTATGCAGCATAACTCGAGTTTTTTACTAACTAACTTTTCATAACGGC  
ATE-160R *SacI* CGGAGAGACTTTAGAGCTCTGCAATAAGATTTGCTG

**PCR verification of  $\Delta ihfA$** 

ATE137 CAGCAGGCGGAGATAAATTAACCC  
ATE140 CTGTTGCTTAAAAGCGCAATCGCC

**PCR verification of  $\Delta ihfB$** 

ATE145 GCCCGTATCGTTCATTTATCTGTTCG  
ATE148 GGTAGAAAGCTGGAATTGGCTTTGCG

**Cloning *IhfA***

ATE-216F *KpnI* GGTCGCACACATTTCTCGGTACCGAGAAGTCGCCCGTG  
ATE-218R *XbaI* CGCCCATTCGTATTGCTGTTGCTTCTAGAAAAGCGCAATCGCC

**Cloning *ihfB***

ATE-219F *KpnI* GGCTGATTTAACTAACGAAGTGGTACCTTGCCGGCGATG

ATE-221R *Xba*I

GGTAATGATTTGATCATTGTTCTAGAAATGGTAACGGCAACCAG

**EMSA**

|                |                                |
|----------------|--------------------------------|
| I-sr f I-84    | GTGCGGTCAGTTTTCCGATG           |
| I-sr r I-85    | CGCCGGCATT CAGCCACAAG          |
| I-sr f II-68   | ATTTTCCTTCACCGTTAAATTCGG       |
| I-sr r II-69   | ACGCACTGCTCGGCGGTAAC           |
| I-sr f III-62  | GAGCTGATGGGCTTTATTCG           |
| I-sr r III-64  | GCCCCAAACATCGGTAAGTCG          |
| I-sr f IV-74   | GCCGGCGATAATTTTCATCAG          |
| I-sr r IV-75   | CATTTGTTCACTCTATGCGGC          |
| I-sr f V-70    | GCACTTCACCGGCATATAAG           |
| I-sr r V-71    | GAAATTTTGTGCATTCCTGAC          |
| I-sr f VI-78   | GGAAAAATCAATGGCTTTCAG          |
| I-sr r VI-79   | CCAGATTTGTGATCTAGTTCTCA        |
| I-sr f VII-63  | CGACTTACCGATGTTTCGGGC          |
| I-sr r VII-66  | GTAAAAGCATGATGGAGATCACT        |
| I-sr f VIII-80 | GATATTAAGCATTTTGGCTCTG         |
| I-sr r VIII-81 | GTTTTTTATTATTATCAATTGTTCTTACCG |
| I-sr f IX-76   | GCCGCATAGAATGAACAAATG          |
| I-sr r IX-77   | GATTTTGGGTATTATTCATTTG         |
| I-sr f X-72    | TGAGAACTAGATCACAAATCTGG        |
| I-sr r X-73    | CTTTGGATCGTTTCTTGATTATCC       |
| I-sr f XI-65   | AGTGATCTCCATCATGCTTTTAC        |
| I-sr r XI-67   | CAGGTTATCGTGATAATAAAAACC       |



|              |                              |
|--------------|------------------------------|
| lsr f XII-82 | GAACGAATTAATGACGGATAATCAAG   |
| lsr r XII-83 | GAATTGATCTGGACTTTAATAATGCCTG |
| lsr f Yp-98  | CCATGGAGACTGTTCTCATG         |
| lsr r Yp-99  | CATCACCCGGCTGTTTACCCGC       |

**Gene Racer**

|          |                                           |
|----------|-------------------------------------------|
| ATE-208R | GCATCTGATTCGGTTTAAGCAACGACATCAGCATTTGTG   |
| ATE-210R | ATAAGCCCACGCATAATTTCCACCAGCTGTTGATCGGCAAC |

**PCR verification of integration**

|           |                                           |
|-----------|-------------------------------------------|
| ATE-208R  | GCATCTGATTCGGTTTAAGCAACGACATCAGCATTTGTG   |
| ATE-210R  | ATAAGCCCACGCATAATTTCCACCAGCTGTTGATCGGCAAC |
| MDJR-123R | GGGTTTTCCAGTCACGACGTTGTAAAACGAC           |
| MDJR-148F | GGTCTGACAGTCGACTTTCGTTGTTGAATACATG        |
